# Supplementary material for: LIMPID: a versatile method for visualization of brain vascular networks
Source: Royal Society of Chemistry journal article supplement (doi:10.1039/d0bm01817a), 2021-01-01
Supplement: d0bm01817a2.pdf [file d0bm01817a2.pdf]

# LIMPID: A Versatile Method for Visualization of Brain Vascular Networks

Wenguang Xie,<sup>‡<sup>a</sup></sup> Xiao-Ting Gong,<sup>‡<sup>b</sup></sup> Xiaofeng Cheng,<sup>‡<sup>a</sup></sup> Jingjing Cao,<sup>\*<sup>b</sup></sup> Jin Zhao,<sup>a</sup> Hao-  
Li Zhang<sup>\*<sup>b, c</sup></sup> and Shengxiang Zhang<sup>\*<sup>a</sup></sup>

<sup>a</sup> Gansu Key Laboratory of Biomonitoring and Bioremediation for Environmental Pollution, School of Life Sciences, Lanzhou University, Lanzhou 730000, P. R. China

<sup>b</sup> State Key Laboratory of Applied Organic Chemistry (SKLAOC); Key Laboratory of Special Function Materials and Structure Design (MOE), College of Chemistry and Chemical Engineering, Lanzhou University, Lanzhou, 730000, P. R. China

<sup>c</sup> Tianjin Key Laboratory of Molecular Optoelectronic Sciences, Department of Chemistry, Tianjin University, and Collaborative Innovation Center of Chemical Science and Engineering (Tianjin), Tianjin 300072, P. R. China

<sup>‡</sup> These authors contributed equally to this work.

\* Correspondence to Shengxiang Zhang ([sxzhang@lzu.edu.cn](mailto:sxzhang@lzu.edu.cn)), Hao-Li Zhang ([haoli.zhang@lzu.edu.cn](mailto:haoli.zhang@lzu.edu.cn)) and Jingjing Cao ([caojj@lzu.edu.cn](mailto:caojj@lzu.edu.cn)).

Shengxiang Zhang, Ph.D.,  
School of Life Sciences,  
Lanzhou University,  
No. 222 South Tianshui Road,  
Lanzhou, Gansu, 730000  
P.R. China

Tel: +86-931-8915607 (S. Z)

Email: [sxzhang@lzu.edu.cn](mailto:sxzhang@lzu.edu.cn)

Hao-li Zhang, Ph.D.,

State Key Laboratory of Applied Organic Chemistry (SKLAOC);

Lanzhou University,

No. 222 South Tianshui Road,

Lanzhou, Gansu, 730000

P.R. China

Tel: +86-931-8912365 (H.L.Z.)

E-mail: [haoli.zhang@lzu.edu.cn](mailto:haoli.zhang@lzu.edu.cn)

Jing-Jing Cao, Ph.D.,

College of Chemistry and Chemical Engineering;

Lanzhou University,

No. 222 South Tianshui Road,

Lanzhou, Gansu, 730000

P.R. China

Tel: +86-18393414322 (J. J. Cao.)

E-mail: [caojj@lzu.edu.cn](mailto:caojj@lzu.edu.cn)

## Supplementary Information

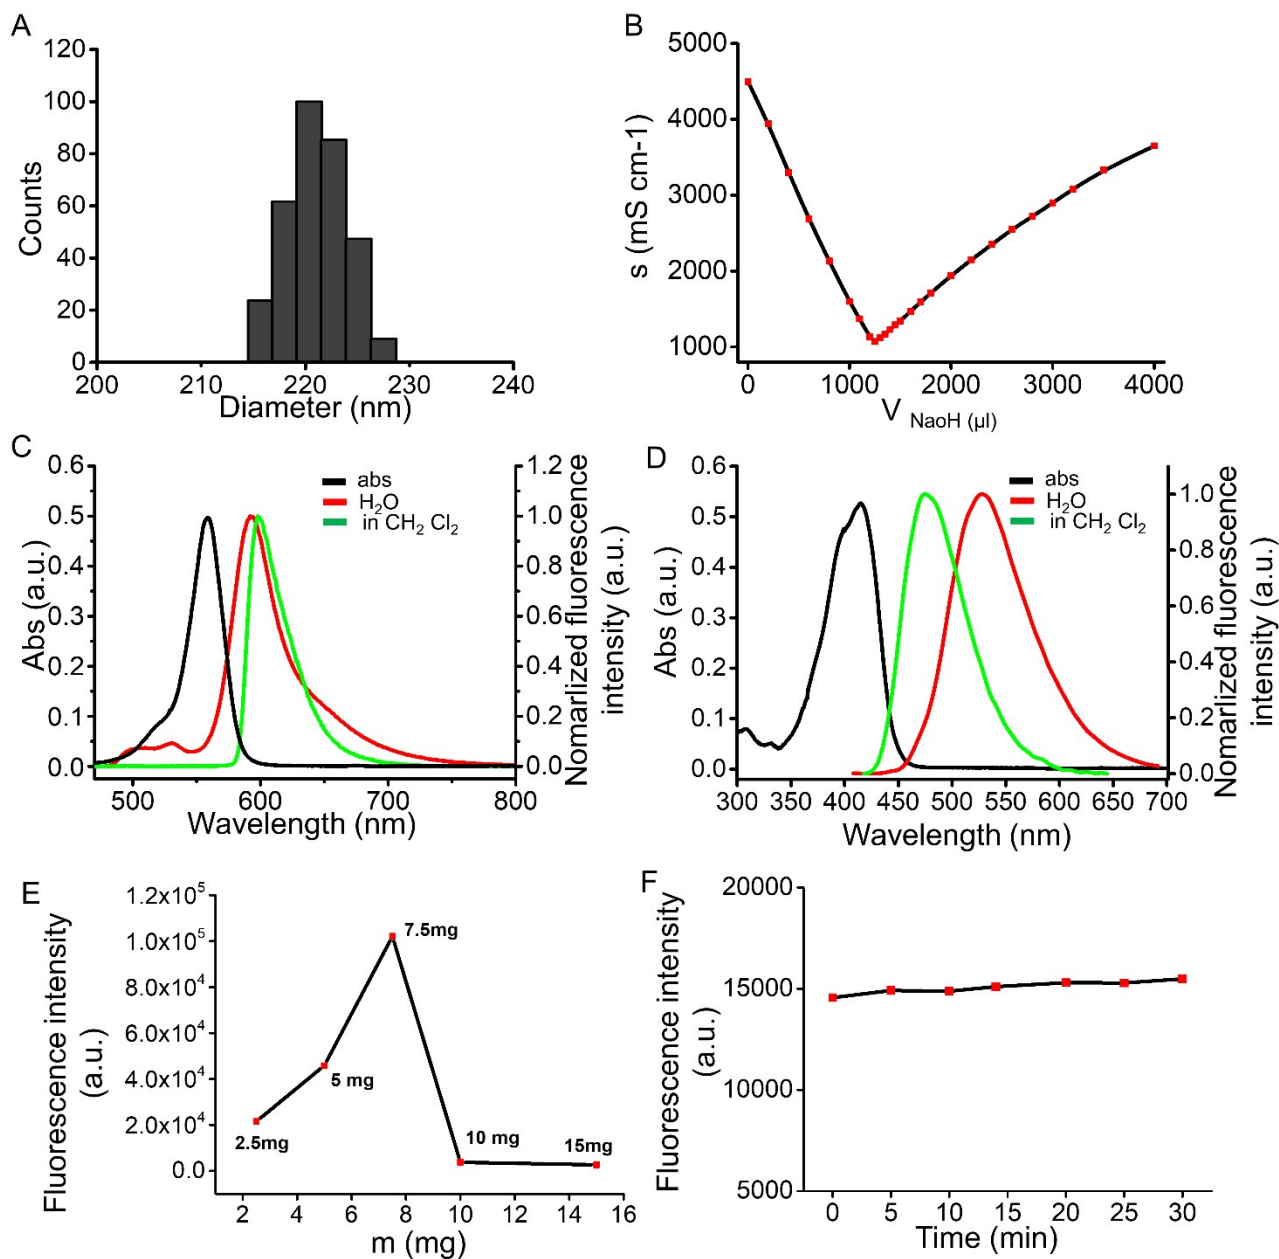

**Fig. S1** Fluorescence spectroscopy measurement of fluorescent dyes and fluorescent nanoparticles. (A) Dynamic light scattering (DLS) measurements of SQ7-ANPs. (B) Conductometric titration detection of ANPs. (C) Absorption (black line) and fluorescence spectra (green line) of dye SQ7 in CH<sub>2</sub>Cl<sub>2</sub> solution (1  $\times$  10<sup>-5</sup> M, Ex: 450 nm), and fluorescence spectra (red line) of SQ7-ANPs (Ex: 450 nm). (D) Absorption (black line) and fluorescence spectra (green line) of BDT in CH<sub>2</sub>Cl<sub>2</sub> solution (1  $\times$  10<sup>-5</sup> M, Ex: 400 nm), and fluorescence spectra (red line) of

BDT-ANPs. (E) Fluorescence intensity of SQ7-ANPs containing different weight of SQ7 in SDS solution (Ex: 557 nm). (F) Fluorescence spectra of SQ7-ANPs in SDS solution ( $1 \times 10^{-5}$  M, Ex: 557 nm) exposing to light for different period of time.

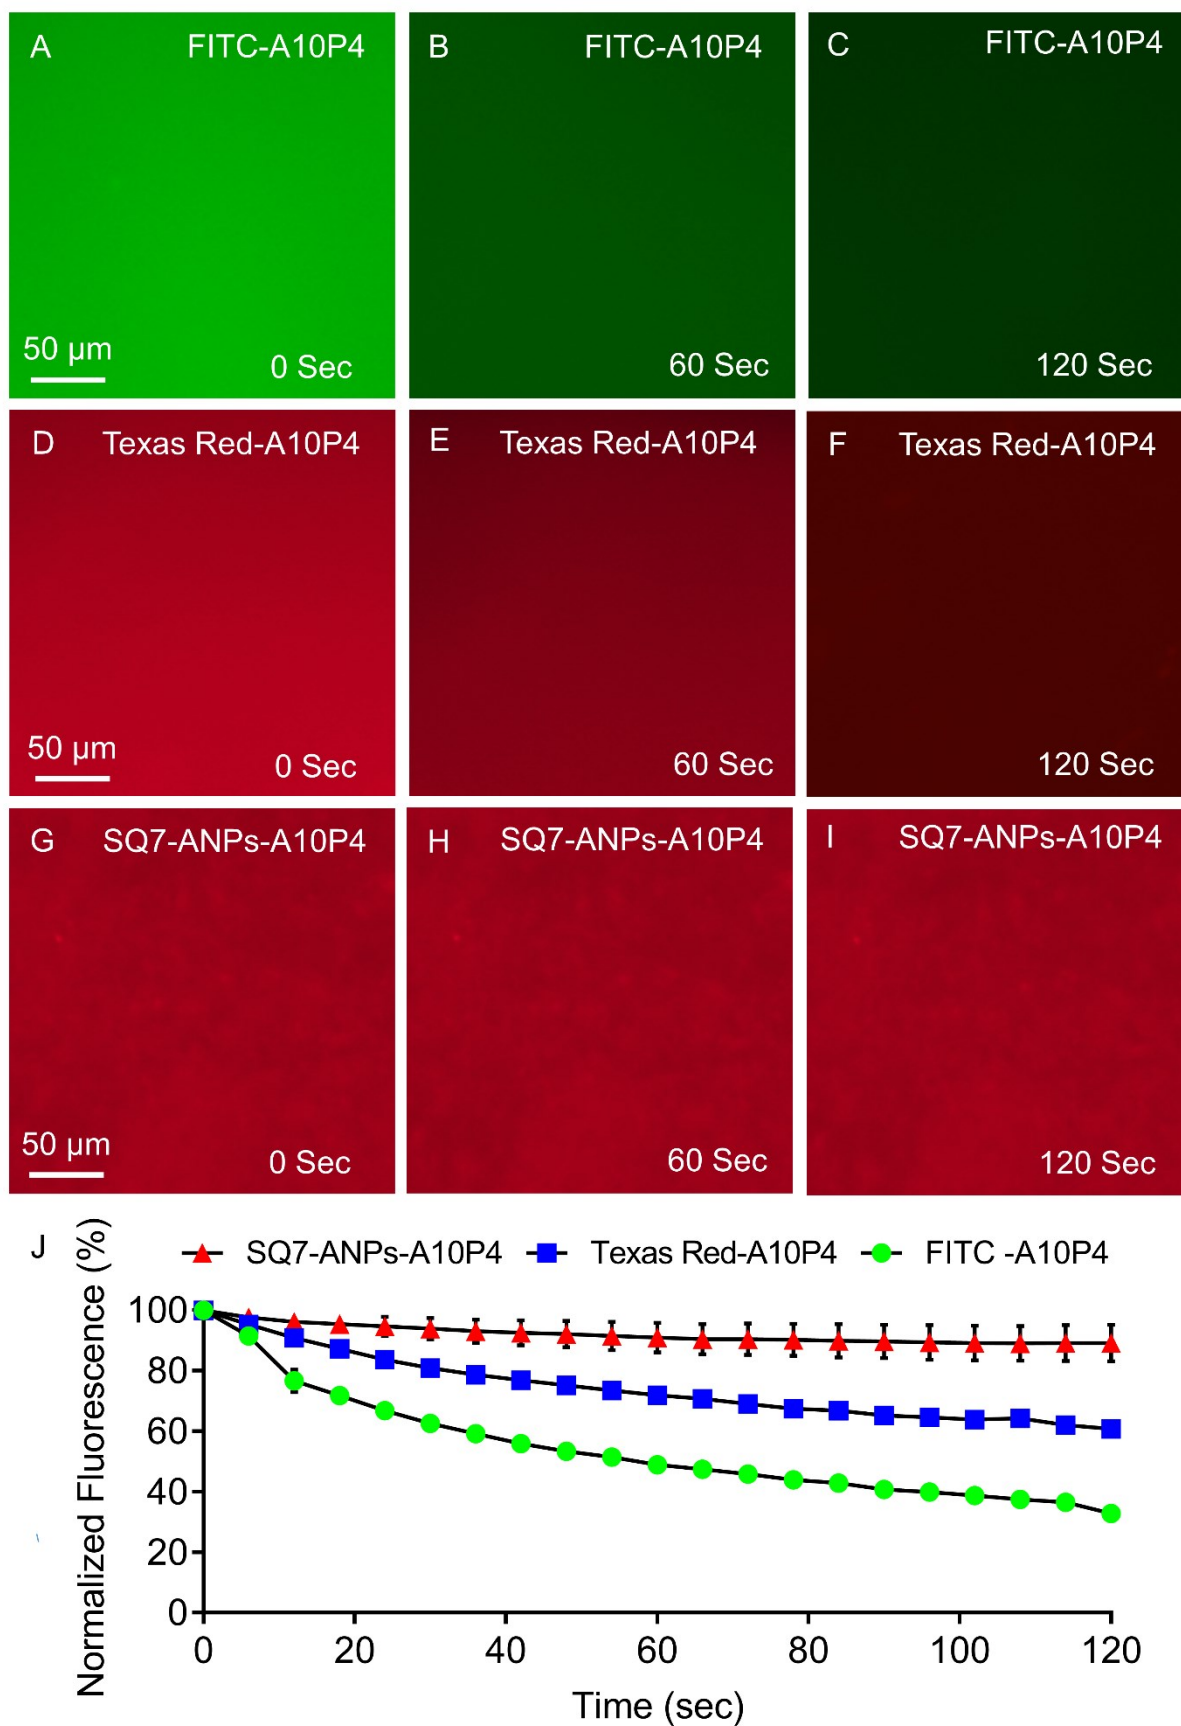

**Fig. S2** Measurement of fluorescence loss in photobleaching of fluorescent hydrogels. (A-C) The representative figures of fluorescence intensity change of FITC-A10P4 hydrogel (BP: 470-490 nm, n=3) at different time points

during photobleaching. (D-F) The representative figures of fluorescence intensity change of Texas Red-A10P4 hydrogel (BP: 510-550 nm, n=3) at different time points during photobleaching. (G-I) The representative figures of fluorescence intensity change of SQ7-ANPs-A10P4 hydrogel (BP: 510-550 nm, n=6) at different time points during photobleaching. (J) Statistical diagram showing fluorescence loss of different fluorescent hydrogels at different time points during photobleaching ( $n \geq 3$ ). The fluorescence intensity is normalized to pre-bleach fluorescent intensity.

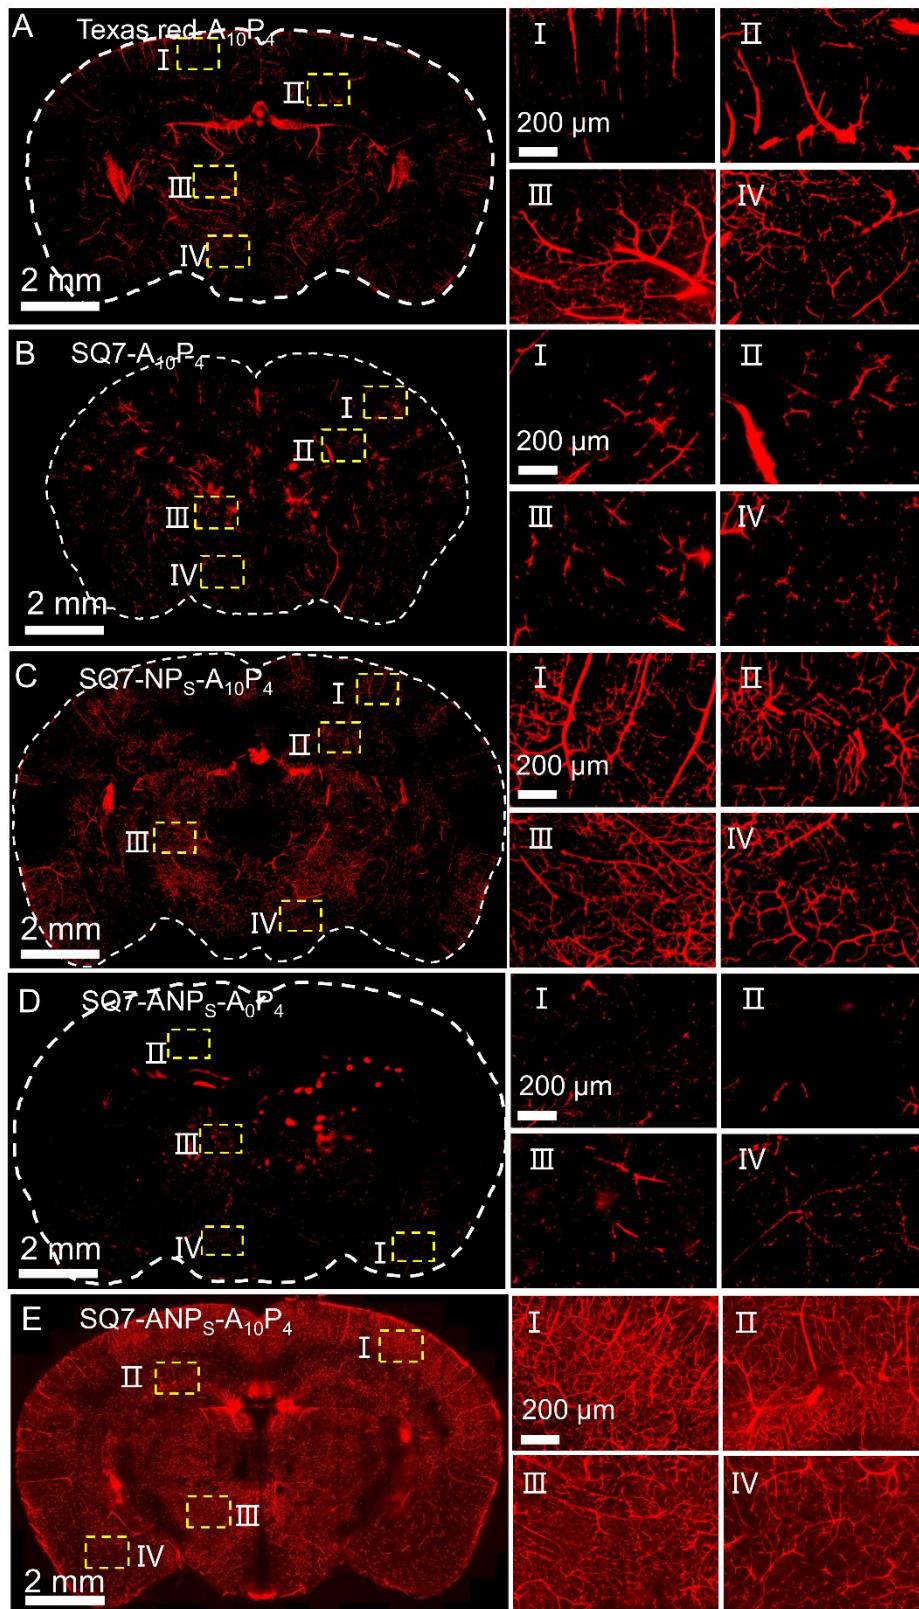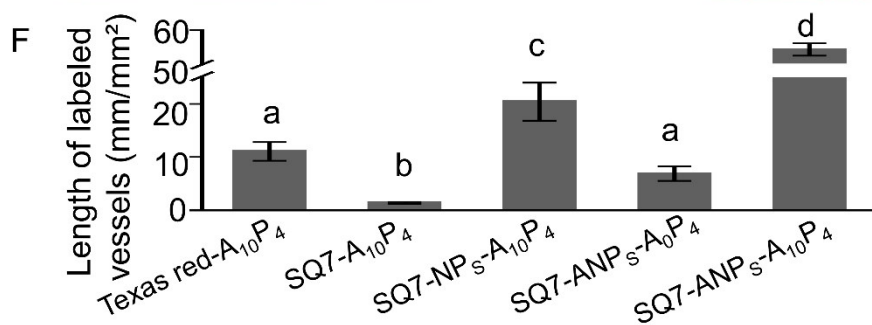

**Fig. S3** Effect of different fluorescent dyes and fluorescent nanoparticles on labeling vascular networks. (A) Images of labeled blood vessels in the brain perfused with Texas red-A10P4. Higher-magnification images of boxed regions in (A) are shown in ( I -IV) (n=4); (B) Blood vessel image in the brain perfused with SQ7-A10P4. Higher-magnification images of boxed regions in (B) are shown in ( I -IV) (n=6); (C) Blood vessel image in the brain perfused with SQ7-NPs-A10P4. Higher-magnification images of boxed regions in (C) are shown in ( I -IV) (n=6); (D) Blood vessel image in the brain perfused with SQ7-ANPs-A0P4. Higher-magnification images of boxed regions in (D) are shown in ( I -IV) (n=5). (E) Blood vessel image in the brain perfused with SQ7-ANPs-A10P4. Higher-magnification images of boxed regions in (E) are shown in ( I -IV) (n=6). (F) Statistical analysis of total length of labeled vessels between different labeling dyes or nanoparticles. a-d in (F) indicate significant differences between the two groups [one-way ANOVA  $F(4,22)=101.4$ ,  $p<0.0001$ ].



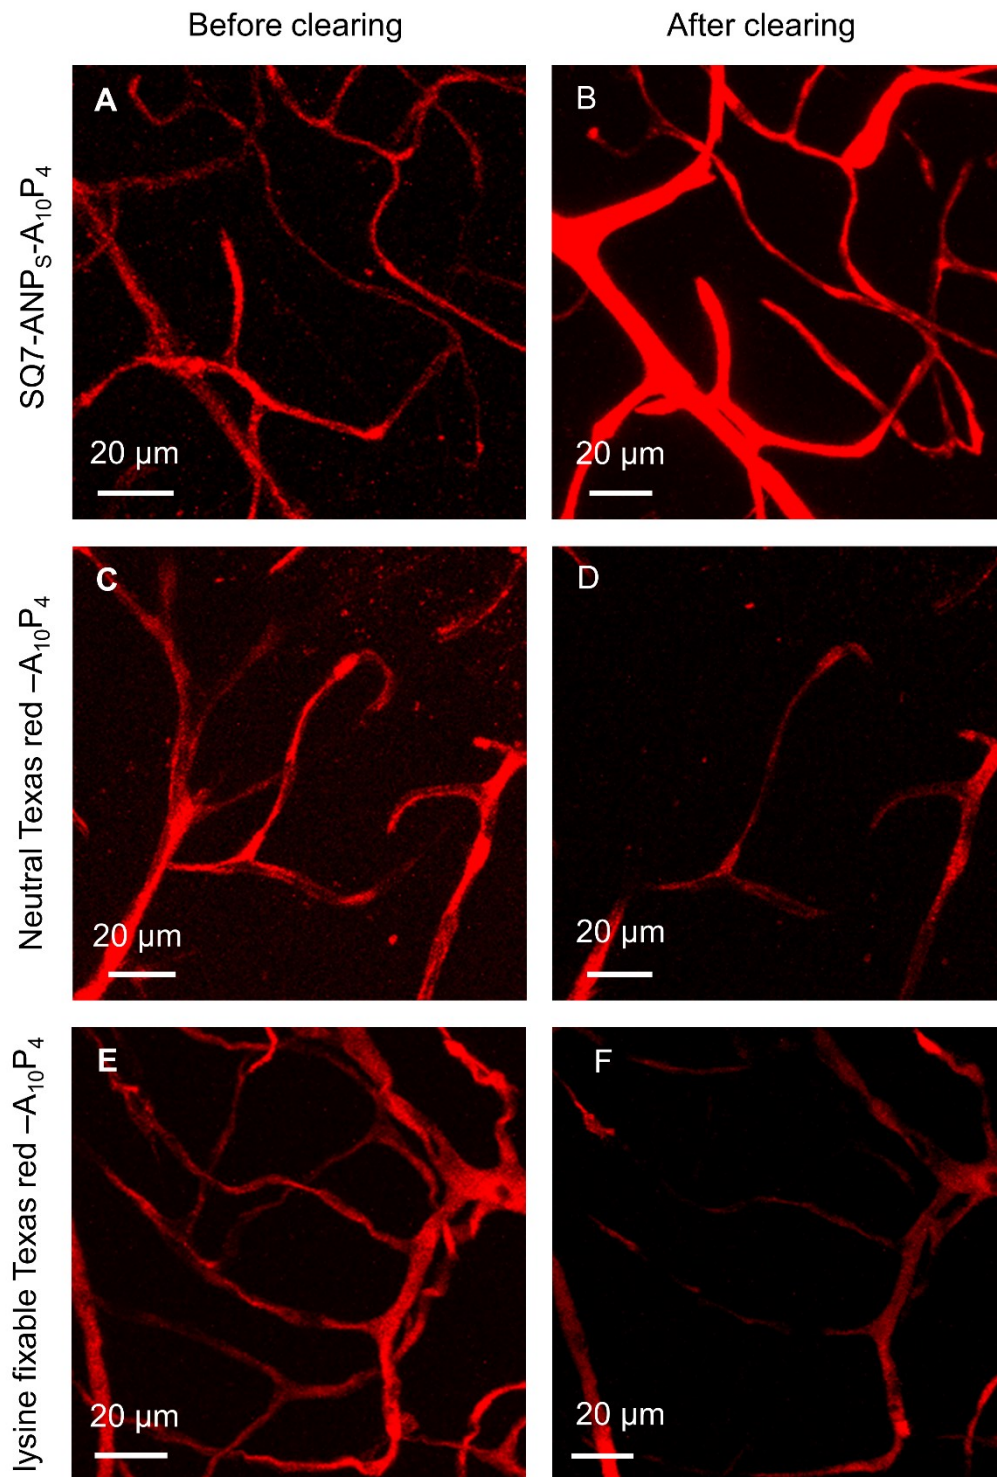

**Figure S4.** Comparison of the effect of blood vessel labeling using different fluorescent dyes before and after clearing. (A-B) Representative images of SQ7-ANPS-A10P4 labeled blood vessels before and after clearing. SQ7-ANPS-A10P4 can stably labelling blood vessels. (C-D) Representative images of neutral Texas red -A10P4 labeled blood vessels before and after clearing (E-F) Representative images of labeled blood vessels with lysine fixable

Texas red -A10P4 before and after clearing. Scale bar = 20  $\mu$ m.

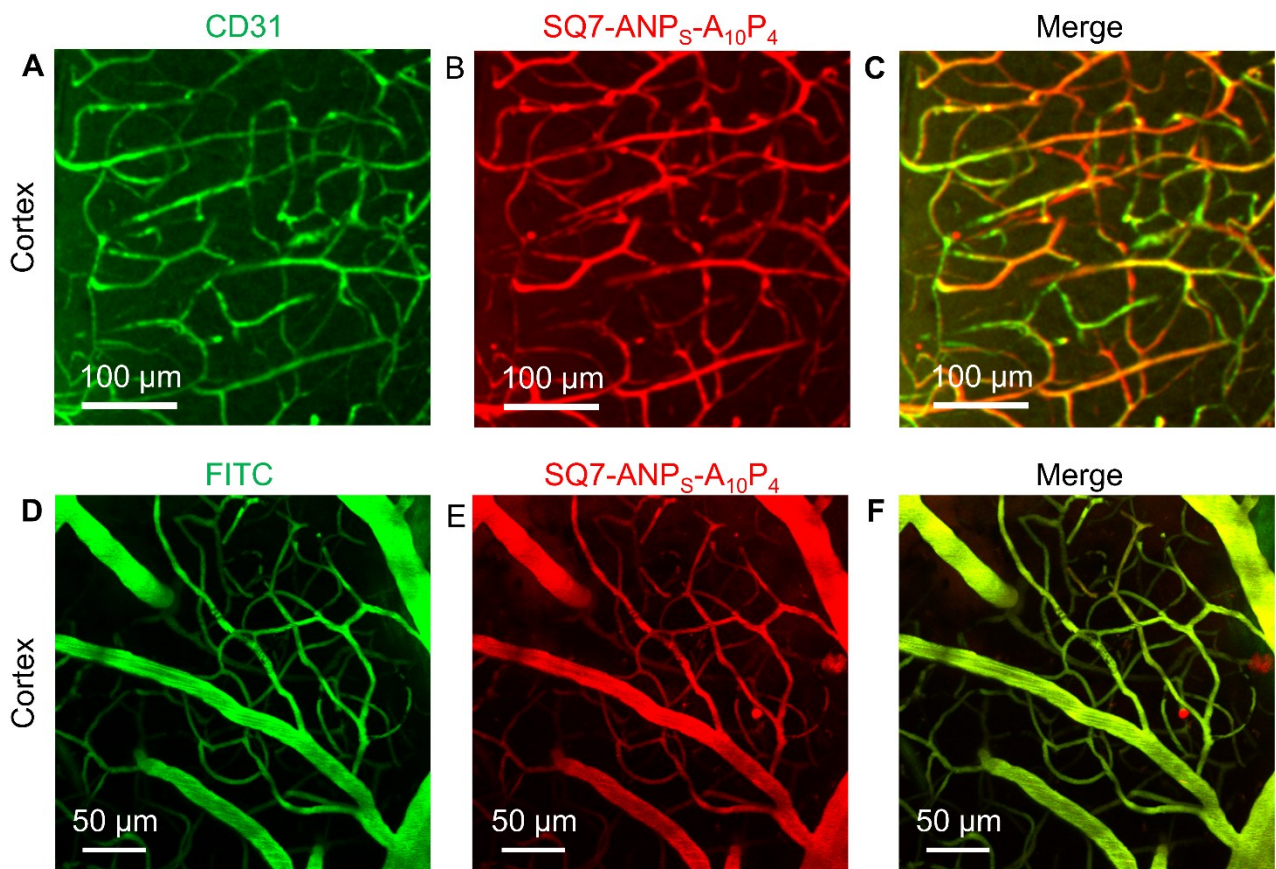

**Figure S5.** Visualization of cerebral vasculature using LIMPID. (A-B) Representative images showing the overlap of anti-CD31 antibody stained blood vessels (green) and SQ7-ANPS-A10P4 labelled blood vessels (red) in a mouse cortex. (C) Merged image showing the overlaps between anti CD31 antibody stained vessels and SQ7-ANPS-A10P4 labelled vessels. Scale bar = 100  $\mu$ m. (D) FITC dextran-labelled blood vessels imaged in a live mouse. (E) SQ7-ANPS-A10P4 labelled blood vessels in the same fields as showed in (D). (F) Merged image showing the overlaps between FITC dextran-labelled blood vessels and SQ7-ANPs-A10P4 labelled vessels. Scale bar = 50  $\mu$ m.



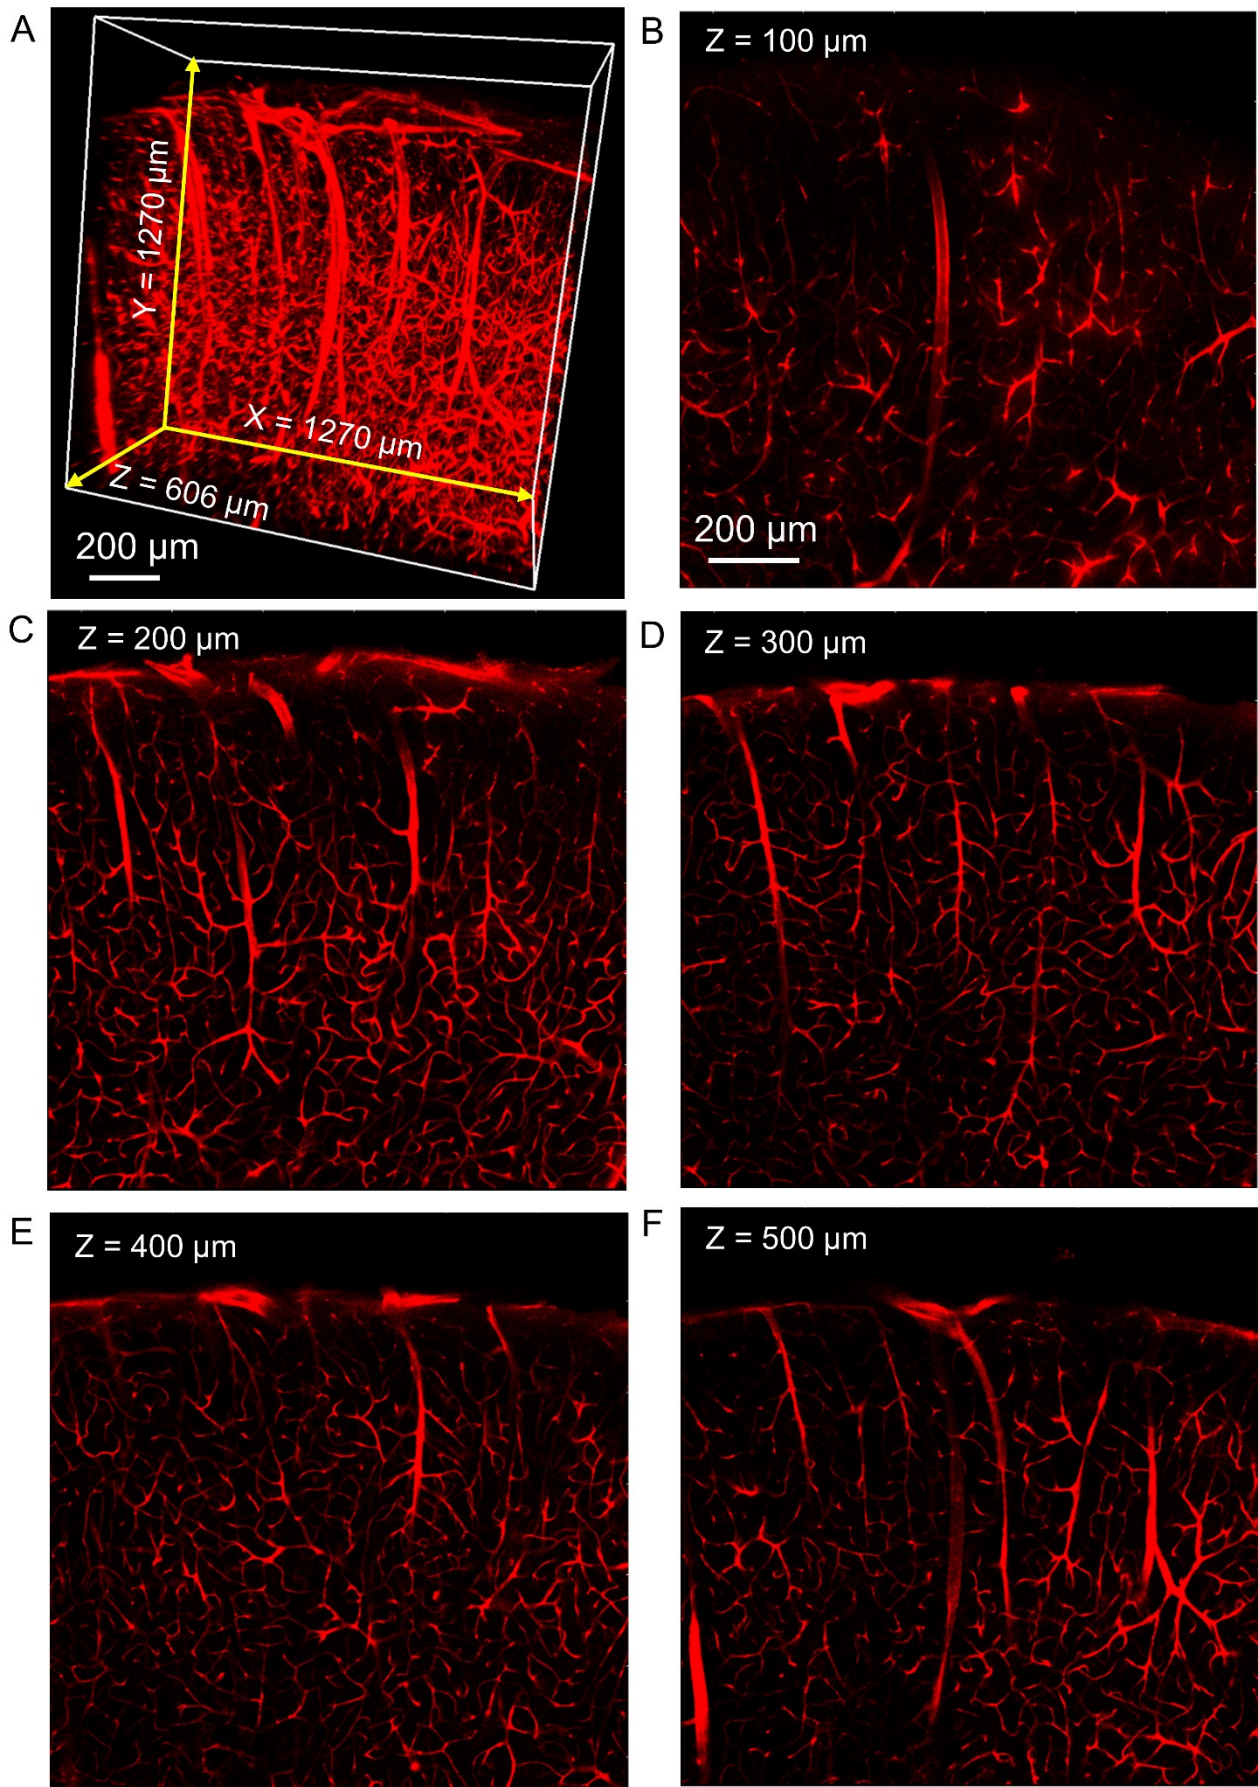

**Figure S6.** Images of vasculature in a mouse brain slice after LIMPID. (A) Representative 3D raw data view of the

vasculature in a cortical slice. Images were obtained using confocal microscopy and the image volume was  $1270\ \mu\text{m} \times 1270\ \mu\text{m} \times 606\ \mu\text{m}$  with a voxel size of  $1.242\ \mu\text{m} \times 1.242\ \mu\text{m} \times 1.25\ \mu\text{m}$ . (B-F). Representative images at different depths of brain slice (100  $\mu\text{m}$ , 200  $\mu\text{m}$ , 300  $\mu\text{m}$ , 400  $\mu\text{m}$ , and 500  $\mu\text{m}$  relative to the surface of the slice) showing that fluorescent nanoparticles penetrated into both surfaces and the deep tissues. Scale bar = 200  $\mu\text{m}$ .
